# Supplementary material for: Structural and biochemical characterization of in vivo assembled Lactococcus lactis CRISPR-Csm complex
Source: PubMed Central journal article supplement (PMC8964682; doi:10.1038/s42003-022-03187-1), 2022-03-29
Supplement: 42003_2022_3187_MOESM1_ESM.pdf [file 42003_2022_3187_MOESM1_ESM.pdf]

# SUPPLEMENTARY INFORMATION

## **Structural and Biochemical Characterization of in vivo Assembled *Lactococcus lactis* CRISPR-Csm Complex**

Sagar Sridhara<sup>1</sup>, Jay Rai<sup>1</sup>, Charlisa Whyms<sup>2</sup>, Hemant Goswami<sup>1</sup>, Huan He<sup>1</sup>, Walter Woodside<sup>3</sup>, Michael P Terns<sup>3,4,5</sup> & Hong Li<sup>1,2\*</sup>

<sup>1</sup>Institute of Molecular Biophysics, Florida State University, Tallahassee, FL 32306, USA.

<sup>2</sup>Department of Chemistry and Biochemistry, Florida State University, Tallahassee, FL 32306, USA.

<sup>3</sup>Department of Microbiology, University of Georgia, Athens, GA 30602, USA.

<sup>4</sup>Department of Biochemistry and Molecular Biology, University of Georgia, Athens, GA 30602, USA.

<sup>5</sup>Department of Genetics, University of Georgia, Athens, GA 30602, USA.

\*Corresponding author: hong.li@fsu.edu

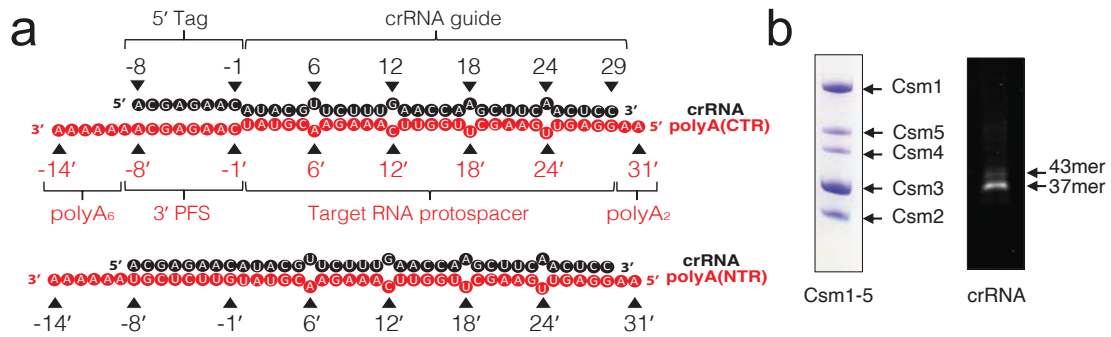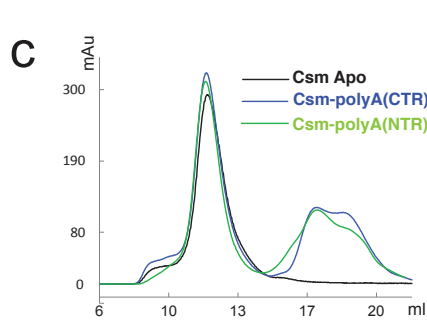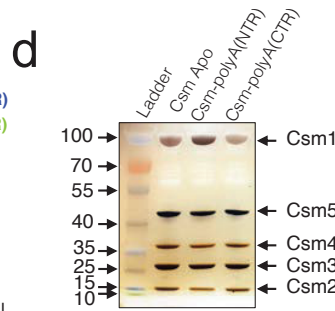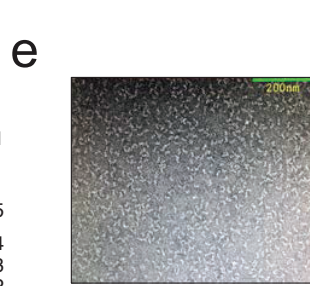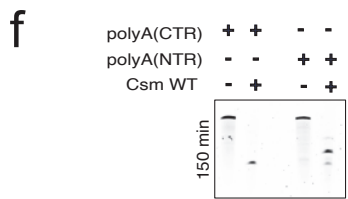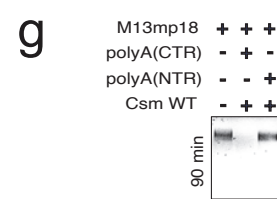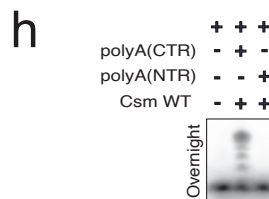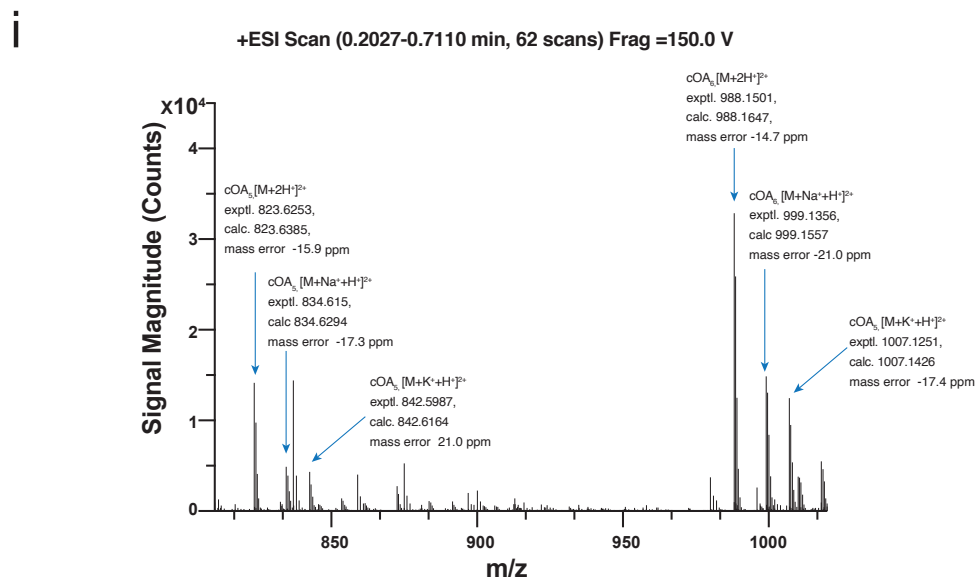

**Figure S1. Cryo-EM sample preparation and activity tests on target RNA. Related to Figures 1, 2, 3 and 4.** (a) Schematic representation and nomenclature of crRNA-polyA(CTR) and crRNA-polyA(NTR) duplexes. The target RNAs used in the cryo-EM samples contained 6-nt and 2-nt polyA extensions at 3'- and 5'-ends respectively. (b) Sodium dodecyl sulfate - polyacrylamide gel electrophoresis (SDS-PAGE) and denaturing Urea PAGE gel images showing the quality of *L. lactis* ribonucleoprotein (RNP) used to make target-free and target-bound complexes for structural studies. The purified RNP contained all five proteins forming the effector complex (Csm1-5) and two species of crRNA (major 37mer species and minor 43mer species). (c) Overlay of size-exclusion chromatograms of no-target (apo), polyA(CTR) and polyA(NTR)-bound Csm complexes in black, blue and green colors respectively. (d) Silver stain profiles of no-target (apo), polyA(CTR) and polyA(NTR)-bound Csm complexes showing the presence of all 5 Csm subunits in all sample preparations. The loaded amounts are too low for crRNA to be visible. (e) Negative stain showing homogenous distribution of LICsm particles during sample screening. The image was collected using FEI CM120 Biotwin transmission electron microscope. (f) *In vitro* RNase cleavage assay showing that polyA(CTR) and polyA(NTR) used for structure determination is similar to RNase activity by Csm WT on CTR and NTR respectively. (g) *In vitro* DNase cleavage assay showing that polyA(CTR) and polyA(NTR) used for structure determination is similar to DNase activity by Csm WT on CTR and NTR respectively. (h) *In vitro* cOA synthesis assay with polyA(CTR) and polyA(NTR) as the stimulators that were used for structure studies. (i) Mass spectra of cOA synthesis products. Identified cOA species are indicated arrows with expected and calculated masses, charge states, and mass errors indicated.

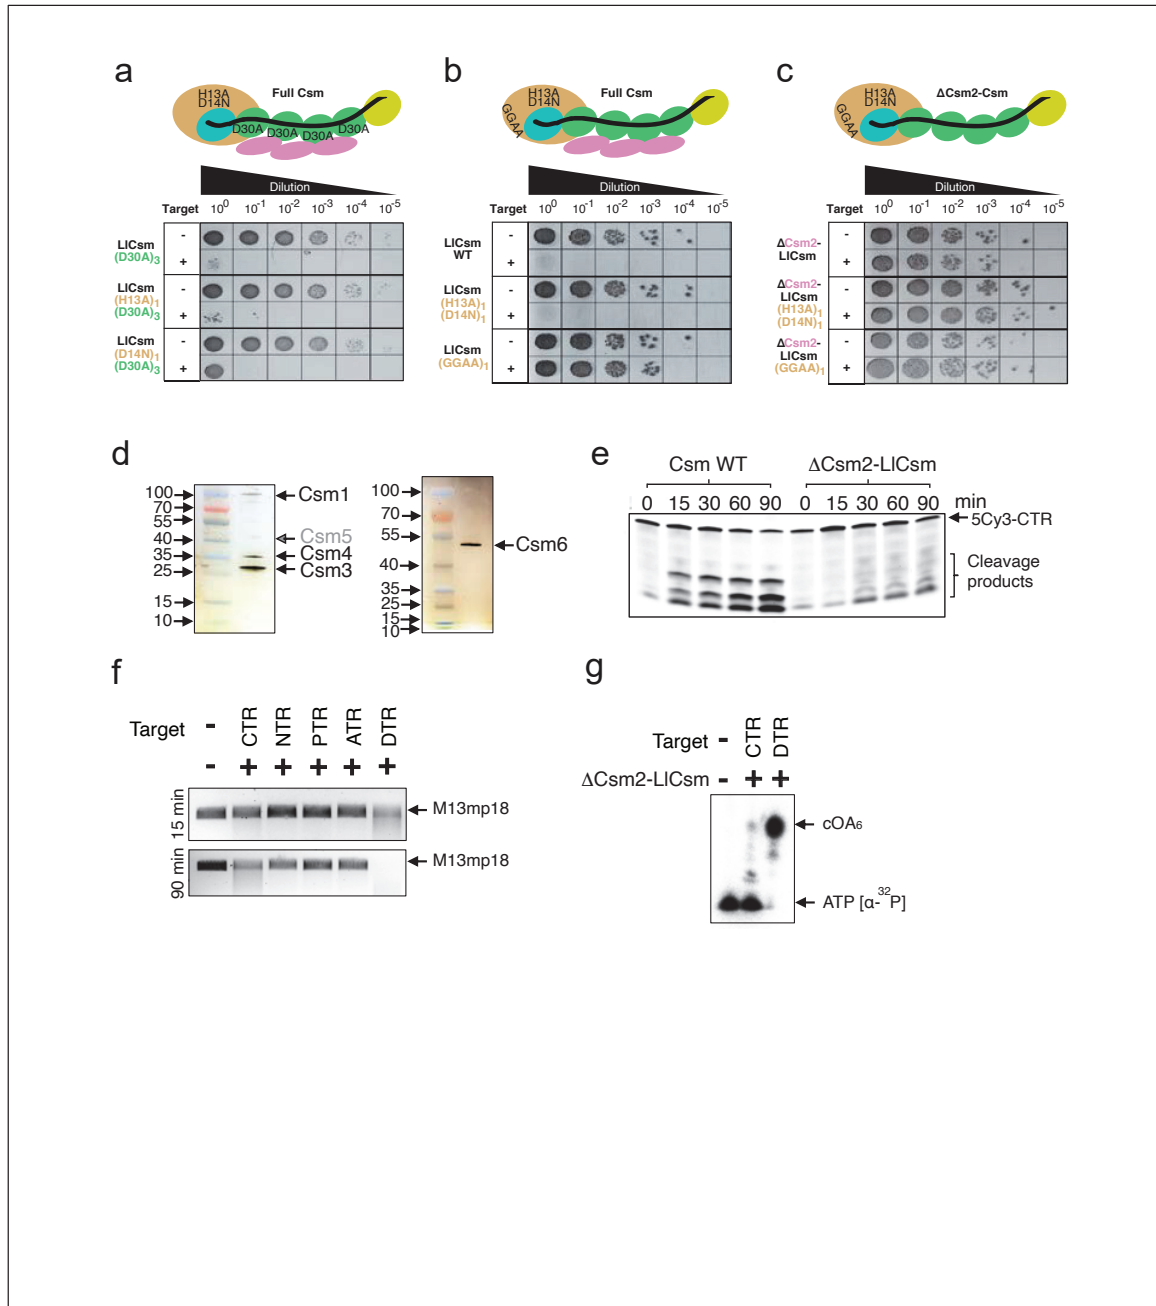

**Figure S2. Assessment of functionality of the wild-type and  $\Delta$ Csm2-LICsm complexes using cell plasmid interference and biochemical assays. Related to Figures 2, 3 and 4, Table S1.** (a) Plasmid interference activities of full LICsm complex harboring Csm1 and/or Csm3 mutations. (b) Plasmid interference activities of full LICsm harboring Csm1 HD

mutation or Csm1 palm2 mutation. (c) Plasmid interference activities of  $\Delta$ Csm2-LlCsm harboring Csm1 HD mutation or Csm1 palm2 mutation. (d) Silver stain profiles of the copurified  $\Delta$ Csm2-LlCsm complex (left) and His-tagged LlCsm6 protein (right). The  $\Delta$ Csm2-LlCsm complex comprises of intact Csm1, Csm4 and Csm3. Csm5 that copurified with His-tagged Csm3 is low but present. (e) *In vitro* RNA cleavage assay by the WT and  $\Delta$ Csm2-LlCsm complex. The RNase reaction products of 5'-Cy3-CTR were analyzed at time points: 0 min, 15 min, 30 min, 60 min and 90 min. (f) *In vitro* DNA cleavage assay by the  $\Delta$ Csm2-LlCsm complex. M13mp18 was used as substrate and the reaction products were analyzed at time points 15 min and 90 min. (g) *In vitro* cOA synthesis assay by the  $\Delta$ Csm2-LlCsm complex. Radiolabeled  $\alpha$ -<sup>32</sup>P-ATP was used as a substrate and the reactions were incubated overnight.

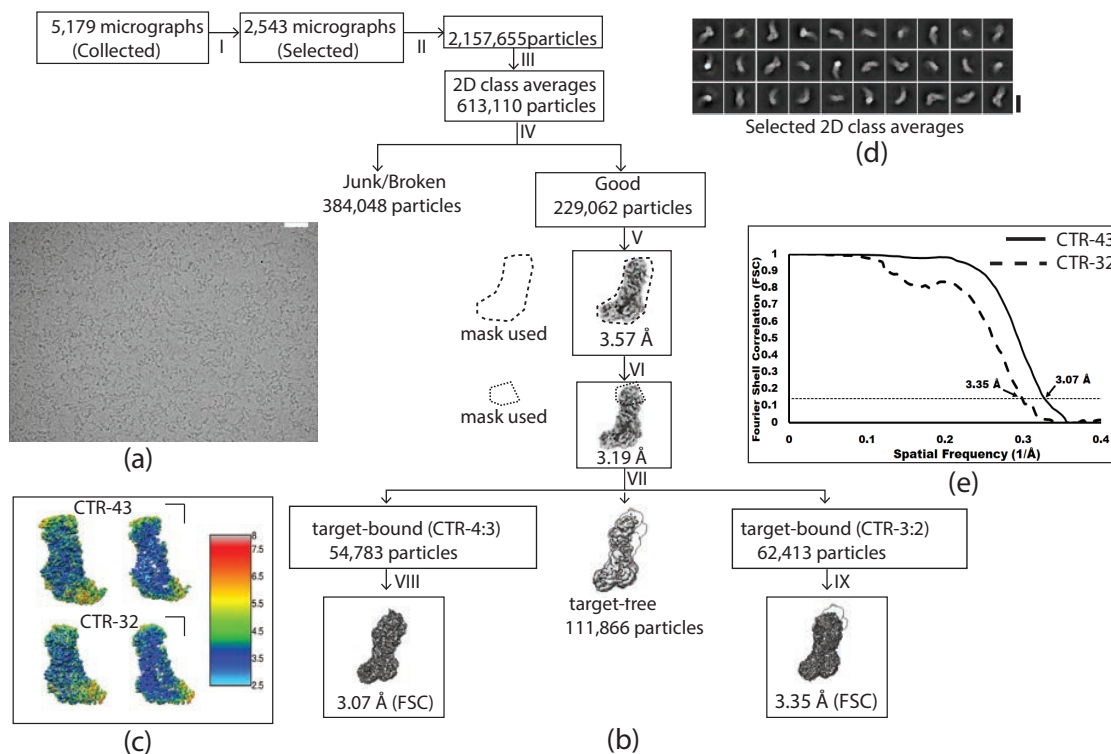

**Figure S3. Cryo-EM data processing and refinement flow chart of LICsm-CTR-43 and LICsm-32 complex. Related to Figure 2.** (a) Raw micrograph (scale bar 20 nm) (b) Image processing flowchart: In total 5,179 micrographs were collected. 2,543 were chosen for the frame alignment. 2,15,655 particles were extracted using Relion 3.0 (1) and imported into cryoSPARC software (2) to perform multiple rounds of 2D analysis. After 2D analysis, 613,110 particles were selected and imported to Relion 3.0 to perform 3D classification that resulted in 229,062 particles which further refine to 3.57 Å resolution and further per particles CTF refine followed by autorefine improved the resolution to 3.19 Å. 3D classification was performed using mask on the top part (Csm5), which sorted out the particles into three classes. First class contain four copies of Csm3 densities and three copies of Csm2 densities (CTR-43). Second class lack Csm2 densities and target RNA densities. Third class contain the three copies of Csm3 densities and two copies of Csm2 densities (CTR-32). 54,783 particles from first class

was imported into CisTEM software (3) and further refined to obtain 3.07 Å resolution. 62,413 particles from third class were further refined using per particle CTF refine and autorefine that resulted in 3.5 Å. (c) Local resolution estimated by Resmap. (d) Selected 2D class averages (scale bar 15 nm). (e) FSC curves.

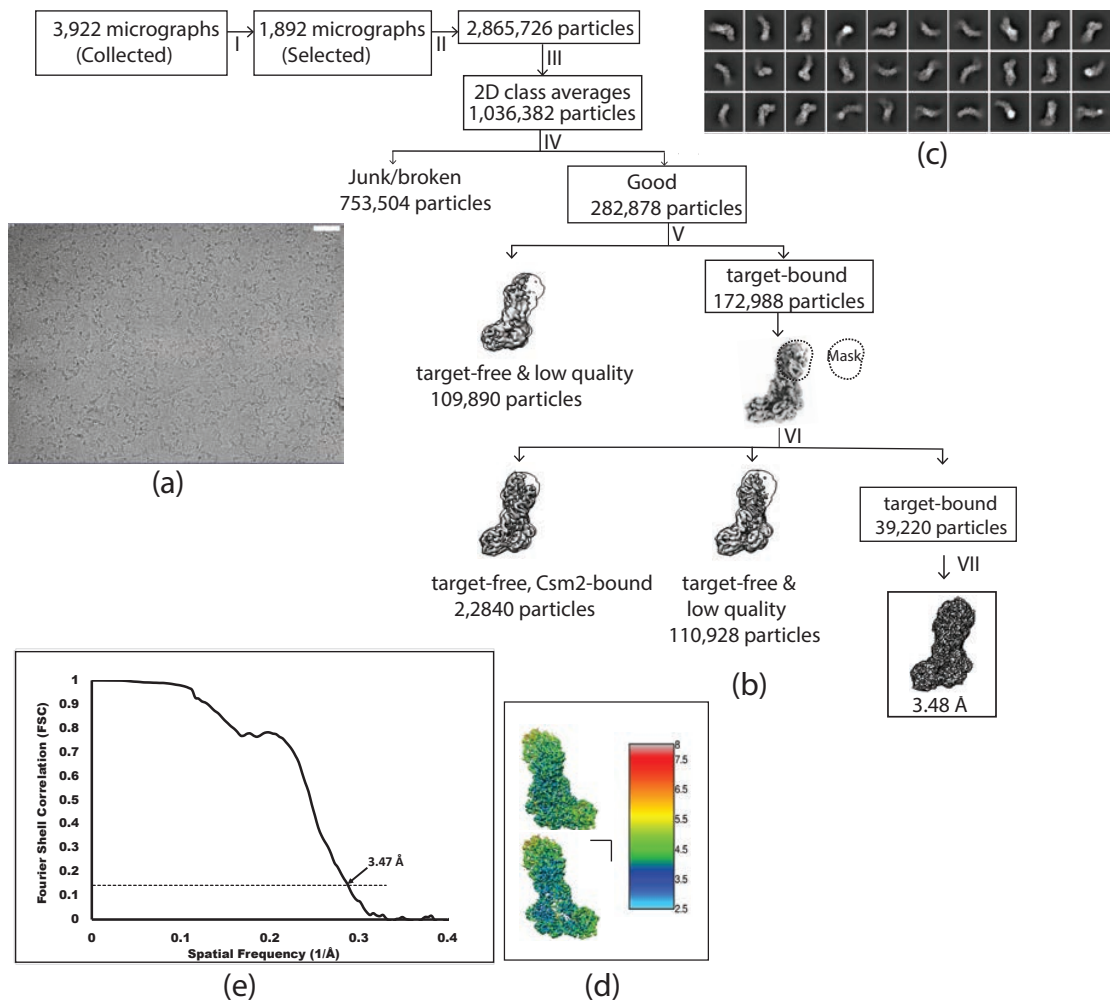

**Figure S4. Cryo-EM data processing and refinement flow chart of LICsm-NTR complex.**

**Related to Figure 3.** (a) Raw micrograph (Scale bar 50 nm) (b) Image processing flow chart:

In total 3,922 micrographs were collected. 1,892 were chosen for the frame alignment. 2,86,726 particles were extracted using RELION 3.0 (4) and imported to cryoSPARC software (2) to perform multiple rounds of 2D analysis. After 2D analysis, 1,036,382 particles were selected to perform 3D classification that resulted in 282,878 particles followed by another round of 3D classifications. The particles with target RNA were pooled together and imported into RELION for classification based on Csm5 using mask on the top part (Csm5) resulting in three classes.



The two classes showed no density of target RNA and were discarded. The third class with target density was further refined with ctf refine that resulted in 3.48 Å resolution. (c) Local resolution estimated by Resmap. (d) Selected 2D class averages (scale bar 15 nm). (e) FSC curve.

## Apo 2.9 Å

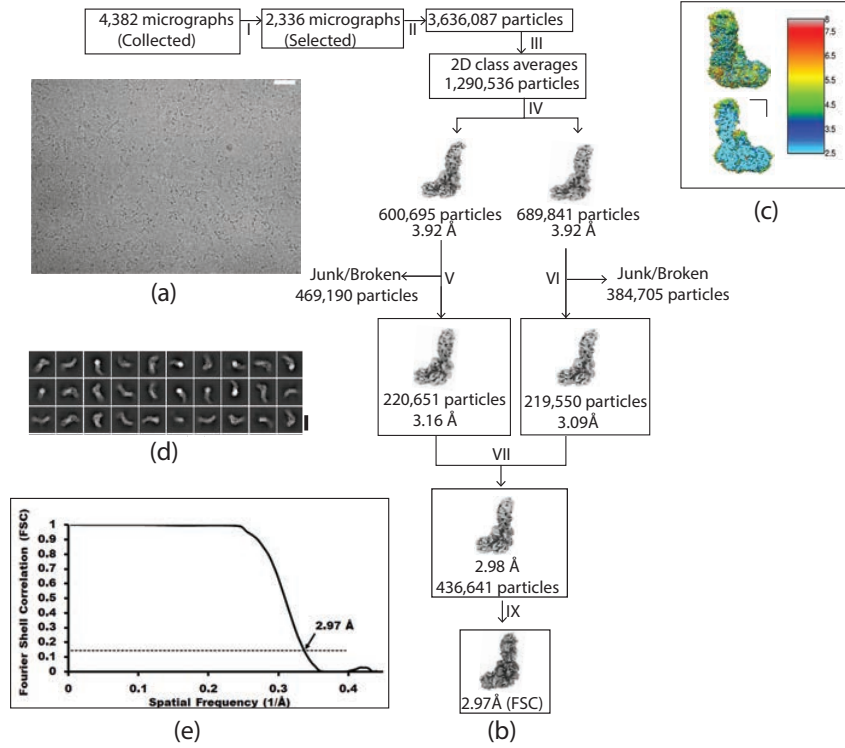

## Apo 4.5 Å

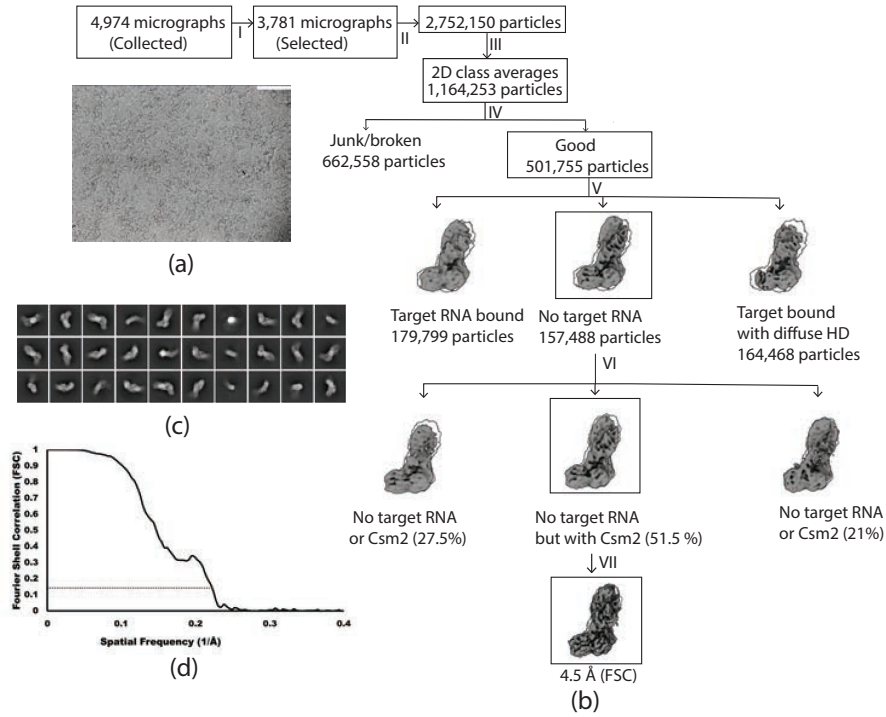

**Figure S5. Cryo-EM data processing and refinement flow chart of LICsm-apo complexes.**

**Related to Figure 4.**

Top, Apo 2.9 Å complex. (a) Raw micrograph (Scale bar 50 nm). (b) Local resolution estimated by Resmap. (c) Image processing flow chart: In total 4,382 micrographs were collected. 2,336 were chosen for the frame alignment. 3,636,687 particles were extracted using RELION 3.0 (4) and imported to cryoSPARC software (2) to perform multiple rounds of 2D analysis. After 2D analysis, 1,290,536 particles were selected and imported to RELION 3 (1) to perform 3D classification that resulted in 436,641 good particles which were used for per particle CTF refine followed by autorefine yielding the resolution of 2.98 Å. Furthermore, the particles were imported in cisTEM which resulted in the resolution of 2.97 Å. (d) Selected 2D class averages (scale bar 15 nm). (e) FSC curve.

Bottom, Apo 4.5 Å complex with analogous analysis as top. (a) Raw micrograph (Scale bar 50 nm). (b) Image processing flow chart; (c) Selected 2D class averages (scale bar 15 nm). (d) FSC curve.

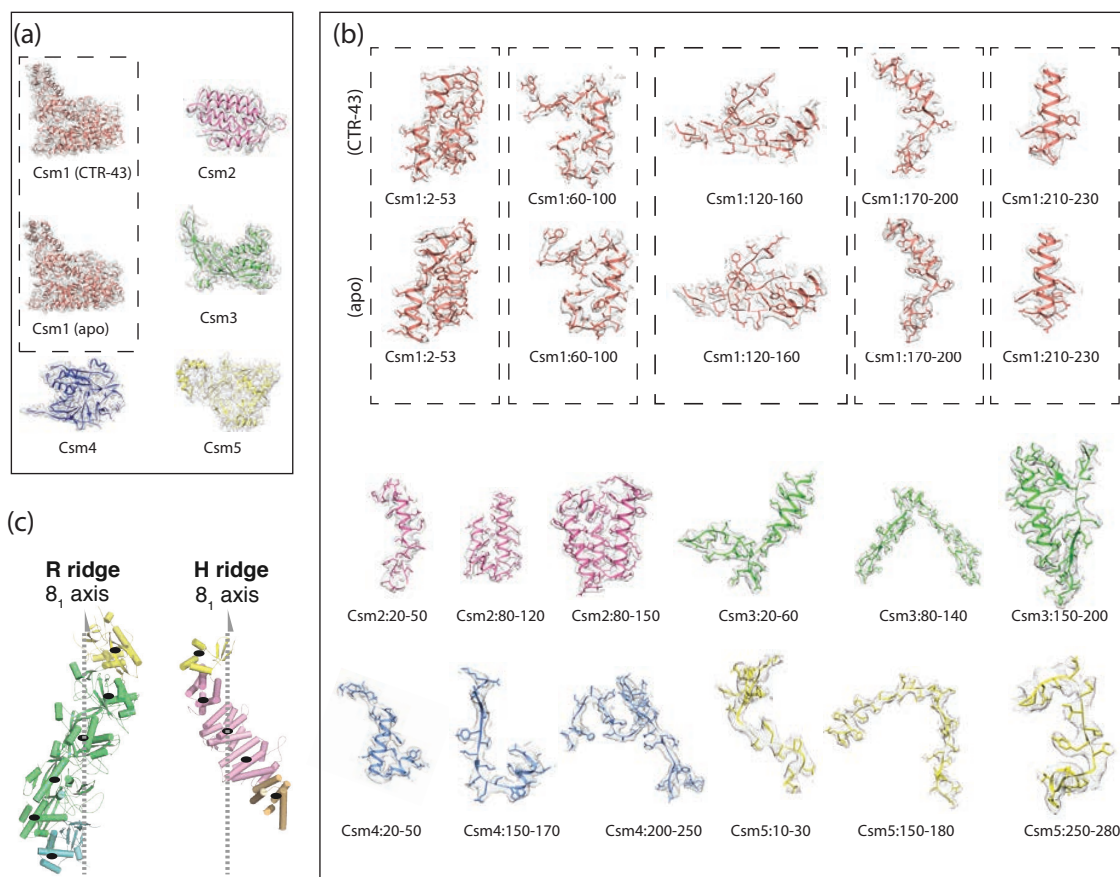

**Figure S6. Density maps superimposed with finally refined models. Related to Figures 2, 3 and 4.** (a) The density map of each subunit is from the CTR-43 structure while that of Csm1 from the apo structure is also shown for comparison. (b) Focused views of the density for selected regions are shown. The densities of Csm1 are shown for both CTR-43 and apo structures for comparison. (c) Isolated R and H ridges with the 8-fold screw axis indicated.

**a**

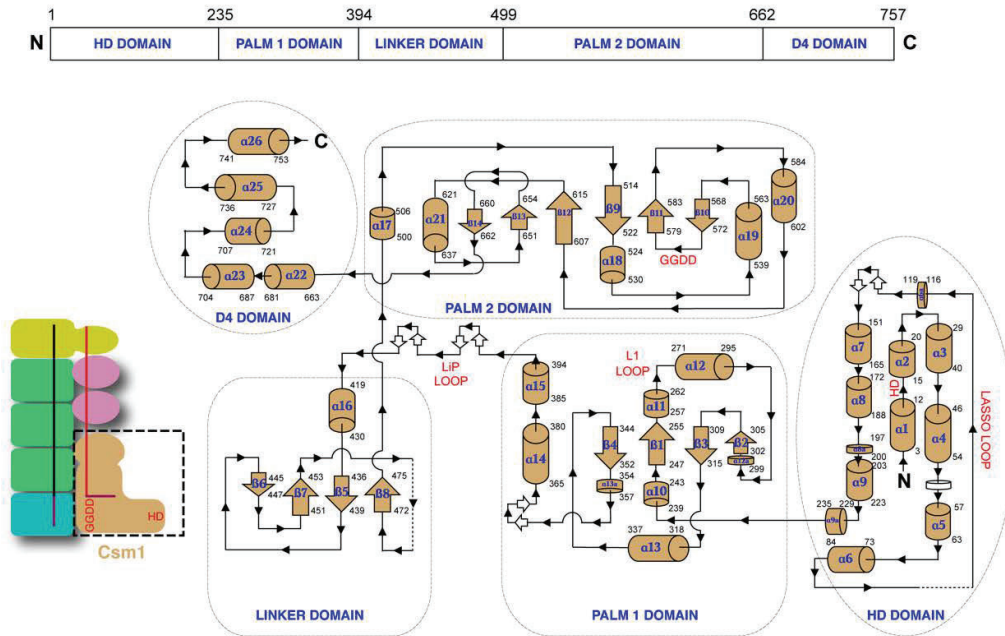

**b**

|        |     |               |                      |          |                 |                    |                   |
|--------|-----|---------------|----------------------|----------|-----------------|--------------------|-------------------|
| LlCsm1 | 1   | MDK---        | INLWCGSLLDHDLGKIVR   | TS---    | ERKRHSKIGGDFIKS | E-----             |                   |
| SeCsm1 | 1   | MNR---        | K-NILMYGSLLDHDLGKIV  | RS       | GDHTFS          | GRHSRIGHCDFISQ     |                   |
| StCsm1 | 1   | MKK---        | EKTIDLFYCALLDHDLGKIV | QR       | TG---           | EKRKHALVIGADVFDEIA |                   |
| MtCsm1 | 1   | MAHMNPQLHEA   | ITGCLLDHDLGKIVQR     | AL---    | GYPGRHSA        | IGRAFVKVWLRDSRNP   | SQFT              |
| SaCsm1 | 1   | MDR---        | K-TNLMYGSLLDHDLGKIV  | YR       | SN              | HAFAGCHSRKIGHKFISQ |                   |
| LbCsm1 | 1   | MDR---        | KMVFETFYGSFLDHDIGK   | AV       | QR              | SASPMYNYNHOTIGSDF  | ENIT              |
| EiCsm1 | 1   | MNR---        | K-DELMYGSLLDHDLGKIV  | YR       | SN              | VDFAIGCHSRKIGSCF   | PKIK              |
| ToCsm1 | 1   | MEI---        | DEL-TALGSLLDHDLGKIV  | QR       | AGL---          | YSGDHS             | TQGARFIRDLA       |
| MjCsm1 | 1   | MGNCN-EYTA    | KIGCALLLDHDLGKIVQR   | AS       | DKP-KSKG        | HDFEYVFLKEKFK      | N---G--           |
|        |     |               |                      |          |                 |                    | <b>HD</b>         |
| LlCsm1 | 69  | KNSI          | FYITPIADN            | ISGMDRRK | LDLE            | EG                 | FNINNEKEKGRQ-     |
| SeCsm1 | 71  | NNTAYITPIADN  | IASGIDRRD            | IIEG     | DEEYKQLF        | ND                 | FNYNSEKLKQT-      |
| StCsm1 | 66  | NHAYITPIADN   | IASGIDRR             | QSN      | ESDE            | -D                 | TSAKI             |
| MtCsm1 | 93  | RLAADAPAYIA   | YNIAGIDRR            | KA--     | SDD-            | G                  | HGAST             |
| SaCsm1 | 71  | NNTAYITPIADN  | IASGIDRRD            | IIEG     | DEEYKQPF        | ND                 | FNYNSEKLKQI-      |
| LbCsm1 | 76  | ERSWAYITPI    | ADNIAIGIDRR          | RYE-     | EC-             |                    | GKGG              |
| EiCsm1 | 71  | DESWAYITPIADN | IASGIDRR             | AS-      | EG              | YE                 | EGENRQR           |
| ToCsm1 | 90  | VLNALIVYBADN  | IASGERE              | ---      | EG              | ---                | POAGRP            |
| MjCsm1 | 76  | KDI           | IGIVRIADN            | ISGGERE  | EP-             | K                  | DP                |
|        |     |               |                      |          |                 |                    | <b>LASSO loop</b> |
| LlCsm1 | 231 | KELEFDY       | -----                | NATEFY   | DRNAFLM         | NF                 | MSGVNF            |
| SeCsm1 | 234 | DELEFSY       | -----                | ENTKSFY  | KKAFL           | LL                 | SMD               |
| StCsm1 | 226 | DELEFSY       | -----                | VSAFYEE  | EAFL            | AS                 | FD                |
| MtCsm1 | 251 | SALFD         | ---                  | QDTPY    | EKAFL           | LT                 | FD                |
| SaCsm1 | 234 | DELEFSY       | -----                | ENTKAFY  | KKAFL           | LL                 | SMD               |
| LbCsm1 | 231 | ATLNLG        | ---                  | ERSFYK   | KAFL            | M                  | SYQ               |
| EiCsm1 | 232 | KELESPY       | -----                | EKTQFY   | EEV             | LL                 | SMD               |
| ToCsm1 | 223 | ---           | ---                  | SGRCR    | KEK             | FL                 | EG                |
| MjCsm1 | 244 | KEYIDDK       | TLEKLF               | NNDNG    | NK              | IE                 | SL                |
|        |     |               |                      |          |                 |                    | <b>L1 loop</b>    |
| LlCsm1 | 394 | OGTENARE      | CRECR                | RS       | ---             | L                  | --                |
| SeCsm1 | 399 | FHSYGRE       | CECR                 | RS       | ---             | D                  | --                |
| StCsm1 | 393 | GGKSSRE       | CEC                  | RS       | ---             | S                  | --                |
| MtCsm1 | 427 | DGQKGRE       | CEC                  | RS       | ---             | T                  | --                |
| SaCsm1 | 399 | FHSYGRE       | CECR                 | RS       | ---             | D                  | --                |
| LbCsm1 | 408 | FGKKSRE       | CEC                  | RS       | ---             | L                  | --                |
| EiCsm1 | 397 | TIHAGT        | CECR                 | RS       | ---             | D                  | --                |
| ToCsm1 | 381 | GHTERLAE      | CP                   | CG       | REL             | --                 | PEG               |
| MjCsm1 | 420 | YNRGS         | NNR                  | VC       | EN              | ---                | F                 |
|        |     |               |                      |          |                 |                    | <b>LIP loop</b>   |
| LlCsm1 | 546 | SRA           | SRRFR                | NYLN     | DAE             | KS                 | ---               |
| SeCsm1 | 558 | SROL          | SLFFR                | YELN     | HHE             | ---                | N                 |
| StCsm1 | 549 | SRS           | SLFFR                | KVY      | IN              | OF                 | AS                |
| MtCsm1 | 588 | SRML          | SLFFR                | QHN      | NYLN            | DA                 | ---               |
| SaCsm1 | 558 | SROL          | SLFFR                | YELN     | HHE             | ---                | N                 |
| LbCsm1 | 571 | SRR           | LD                   | FFR      | NYLN            | OY                 | AD                |
| EiCsm1 | 556 | SROL          | SL                   | FFR      | FEL             | SN                 | IK                |
| ToCsm1 | 542 | SRF           | LDY                  | FFR      | KY              | IG                 | AL                |
| MjCsm1 | 611 | SSM           | LD                   | LF       | FT              | CG                 | Y                 |
|        |     |               |                      |          |                 |                    | <b>GGDD motif</b> |

**Figure S7. Domain organization, topology and multiple sequence alignment of LICsm1.**

**Related to Figures 2, 3 and 4.** (a) Topology map of LICsm1 composed of N-terminal HD domain, palm1 domain, linker domain, palm2 domain and C-terminal D4 domain. The DNase HD catalytic site, the GGDD motif constituting the cOA synthesis site and the loops important in dynamic functioning: Lasso loop, L1 loop and LiP loop are highlighted. (b) Multiple sequence alignment of *Lactococcus lactis* Csm1 (LICsm1) with bacterial Csm1 orthologs from *Staphylococcus epidermidis* (SeCsm1), *Streptococcus thermophilus* (StCsm1), *Mycobacterium tuberculosis* (MtCsm1), *Staphylococcus aureus* (SaCsm1), *Lactobacillus delbrueckii* subsp. *bulgaricus* (LbCsm1), *Enterococcus italicus* (EiCsm1) and archaeal orthologs from *Thermococcus onnurineus* (ToCsm1), *Methanocaldococcus jannaschii* (MjCsm1). The red dashed boxes highlight highly conserved HD residues, sequence-variable lasso loop, L1 loop, LiP loop and conserved GGDD motifs. The black triangles indicate four strongly conserved cysteine residues forming the Zinc-finger motif in Csm1 orthologs.

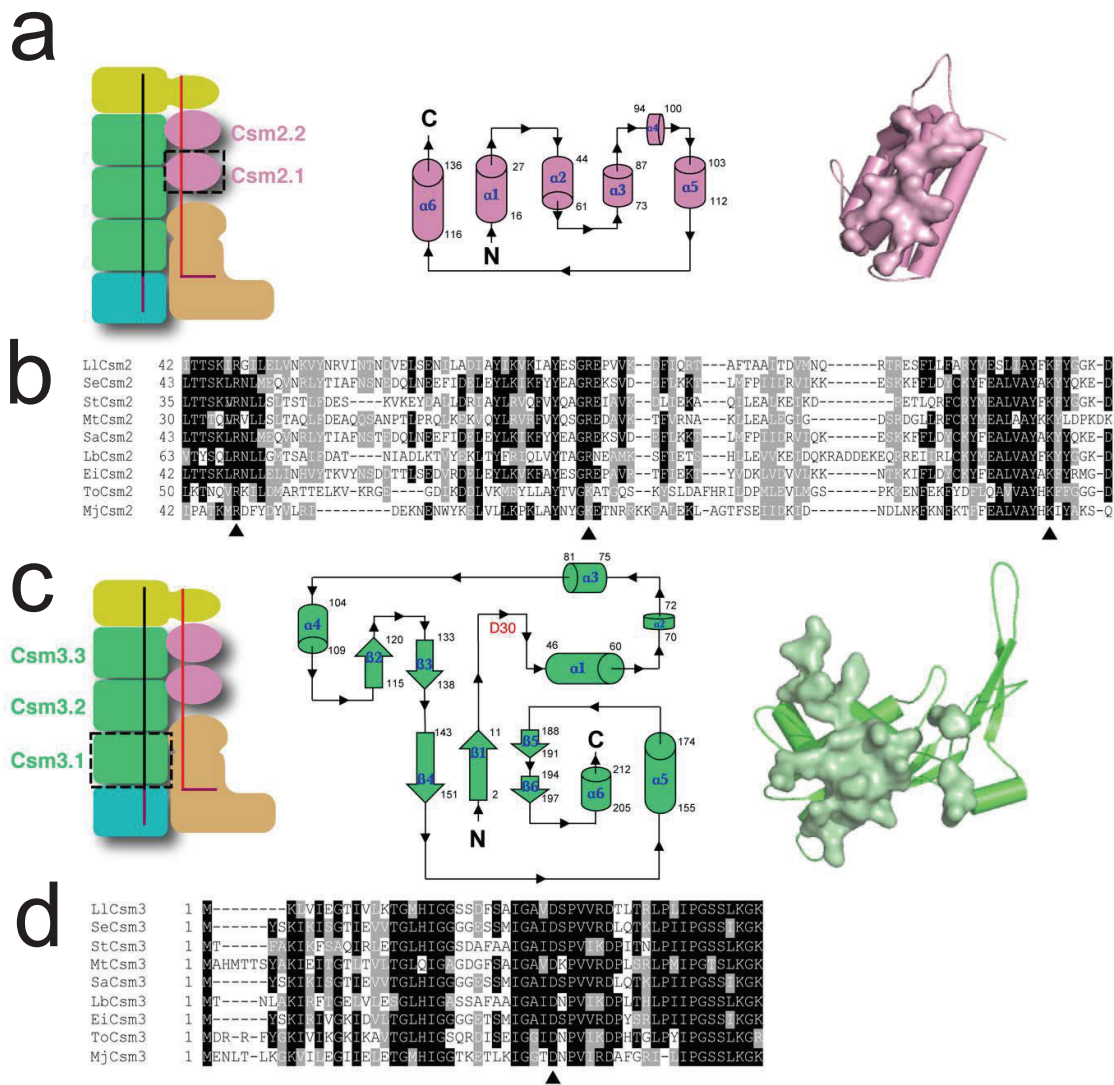

**Figure S8. Topology, multiple sequence alignment and subunit interfaces of LICsm2 and LICsm3. Related to Figure 5.** (a) Topology map of helical LICsm2. Interface residues of Csm2 are identified to be 4 Å from its neighboring Csm2 subunit and are shown in surface representation. (b) Multiple sequence alignment of *Lactococcus lactis* Csm2 (LICsm2) with bacterial Csm2 orthologs from *Staphylococcus epidermidis* (SeCsm2), *Streptococcus thermophilus* (StCsm2), *Mycobacterium tuberculosis* (MtCsm2), *Staphylococcus aureus* (SaCsm2), *Lactobacillus delbrueckii* subsp. *bulgaricus* (LbCsm2), *Enterococcus italicus*

(EiCsm2) and archaeal orthologs from *Thermococcus onnurineus* (ToCsm2), *Methanocaldococcus jannaschii* (MjCsm2). Important residues are highlighted by black triangles. (c) Topology map of LICsm3. The location of RNase catalytic site D30 is highlighted in red. Interface residues of Csm3 are identified to be 4 Å from its neighboring Csm3 subunit and are shown in surface representation. (d) Multiple sequence alignment of *Lactococcus lactis* Csm3 (LICsm3) with bacterial Csm3 orthologs from *Staphylococcus epidermidis* (SeCsm3), *Streptococcus thermophilus* (StCsm3), *Mycobacterium tuberculosis* (MtCsm3), *Staphylococcus aureus* (SaCsm3), *Lactobacillus delbrueckii* subsp. *bulgaricus* (LbCsm3), *Enterococcus italicus* (EiCsm3) and archaeal orthologs from *Thermococcus onnurineus* (ToCsm3), *Methanocaldococcus jannaschii* (MjCsm3). The strongly conserved Aspartate residue important for target RNA cleavage is highlighted in black triangle.



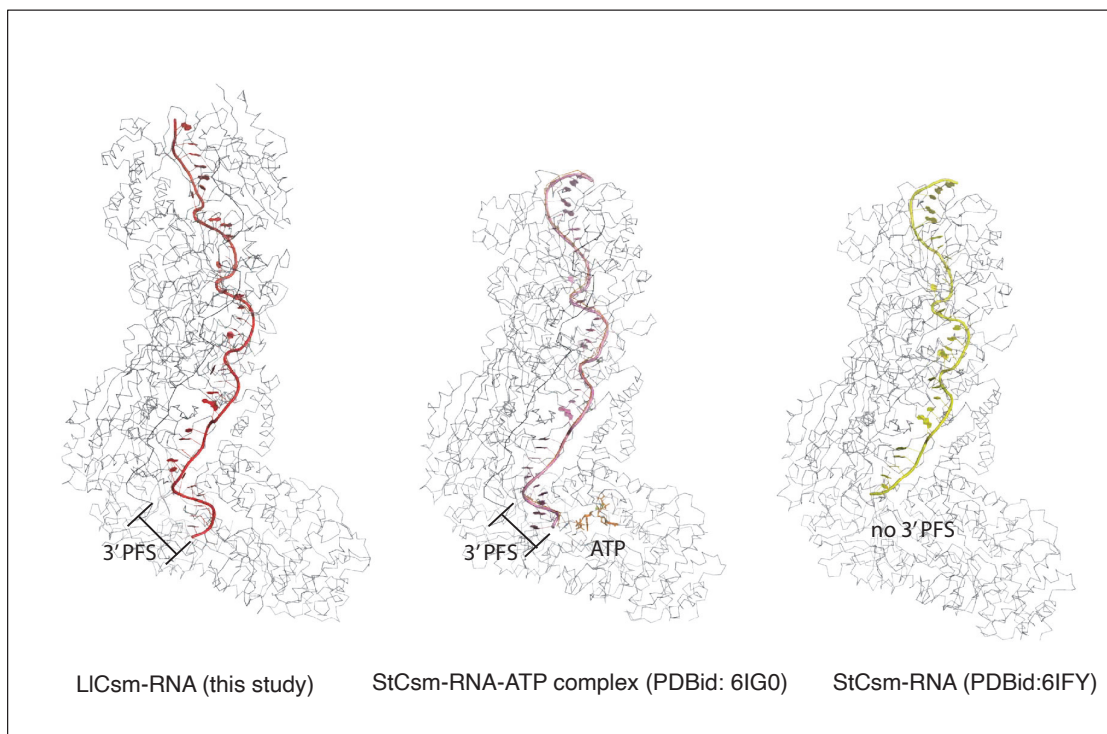

**Figure S9. Comparison of 3' PFS structures between LICsm and StCsm. Related to Figures, 2, 3, & 4.** The target RNA in each of the three complexes is colored red (LICsm), pink (StCsm, 6IG0), or yellow (StCsm, 6IFY), respectively. No 3' PFS was observed in StCsm complex in absence of ATP or its non-hydrolysable analogs.

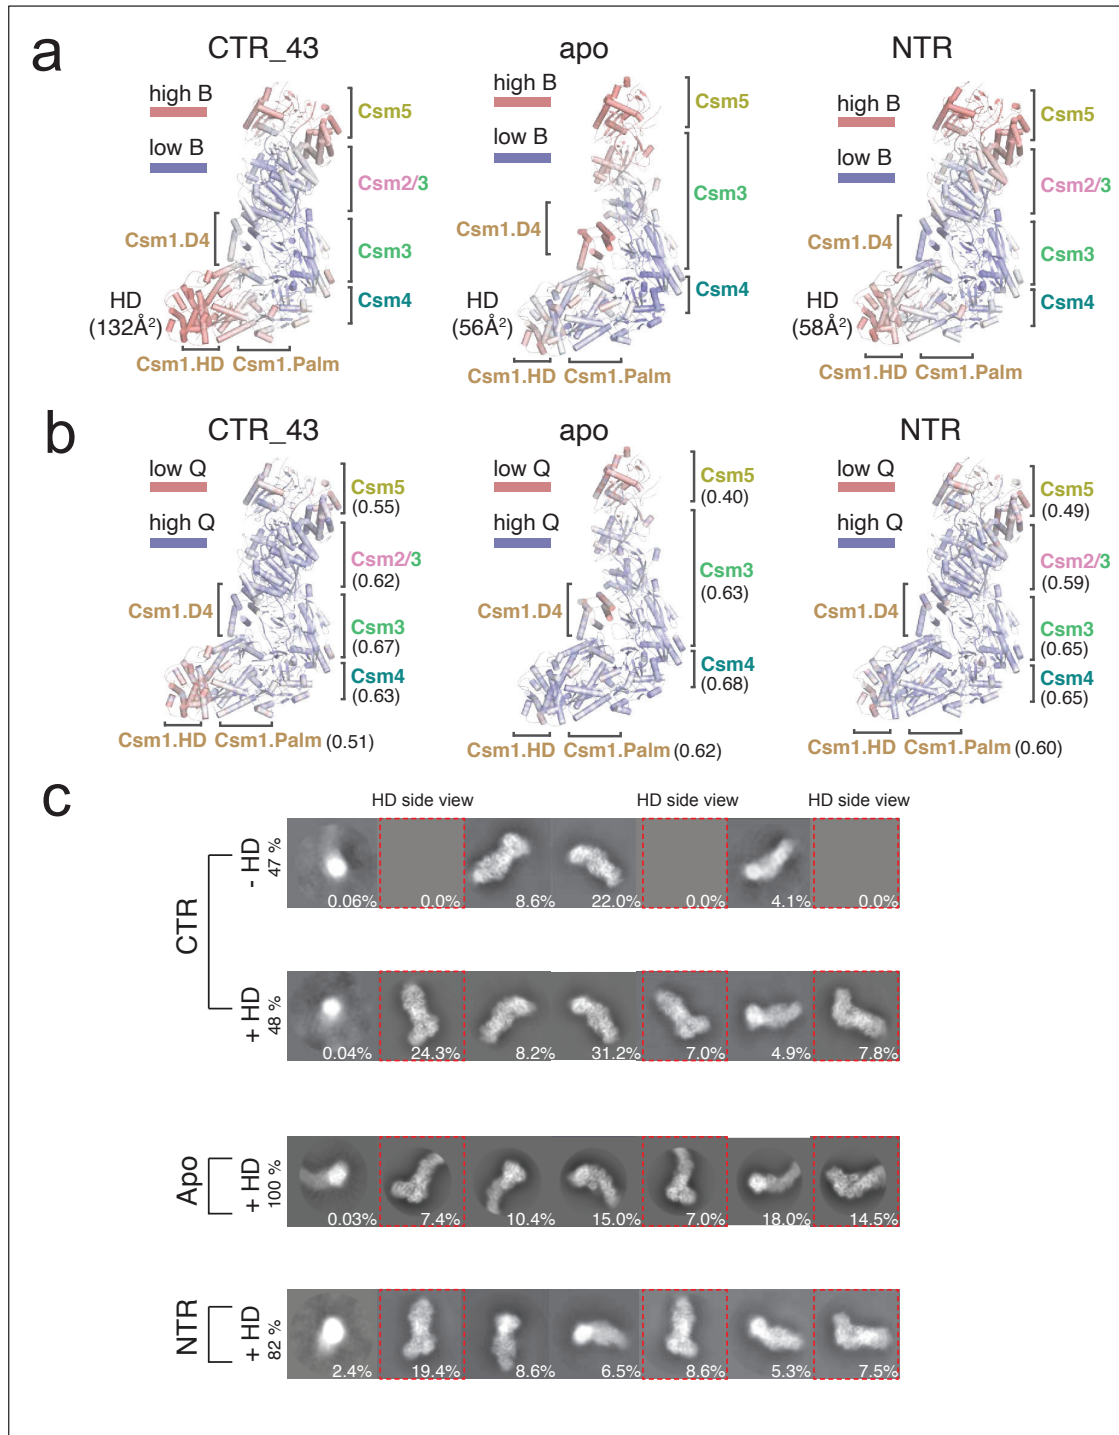

**Figure S10. Flexibility of the three Llcsm complexes indicated by model B factors and 2D class average analyses. Related to Figure 6. (a) B factors of each complex are plotted on the refined models in a color gradient with blue being low and red being high values. Location of the subunits or domains of Csm1 are labeled and the average B factor of the HD domain is included in the parenthesis for each complex.**

(b) Q scores of each complex are plotted on the refined models in a color gradient with blue being high and red being low values. Location of the subunits or domains of Csm1 are labeled. Average Q-scores for all subunits are included in the paranthesis. (c) 2D class averages of particles used for reconstruction of the CTR-43, Apo, and NTR complexes. For each complex, particles were 3D sorted using a mask around the HD domain followed by 2D class averaging. CTR-43 particles showed two major classes, one with the HD domain and one lacking the HD domain, while NTR and the Apo particles had primarily the class with HD domain. 2D averages were obtained for the CTR-43 particles with HD domain (+HD) and those without HD domain (-HD) and for Apo and NTR particles. The percent of each 2D class with respect to total is indicated. A large number of CTR-43 particles lack the sideviews of the HD domain.

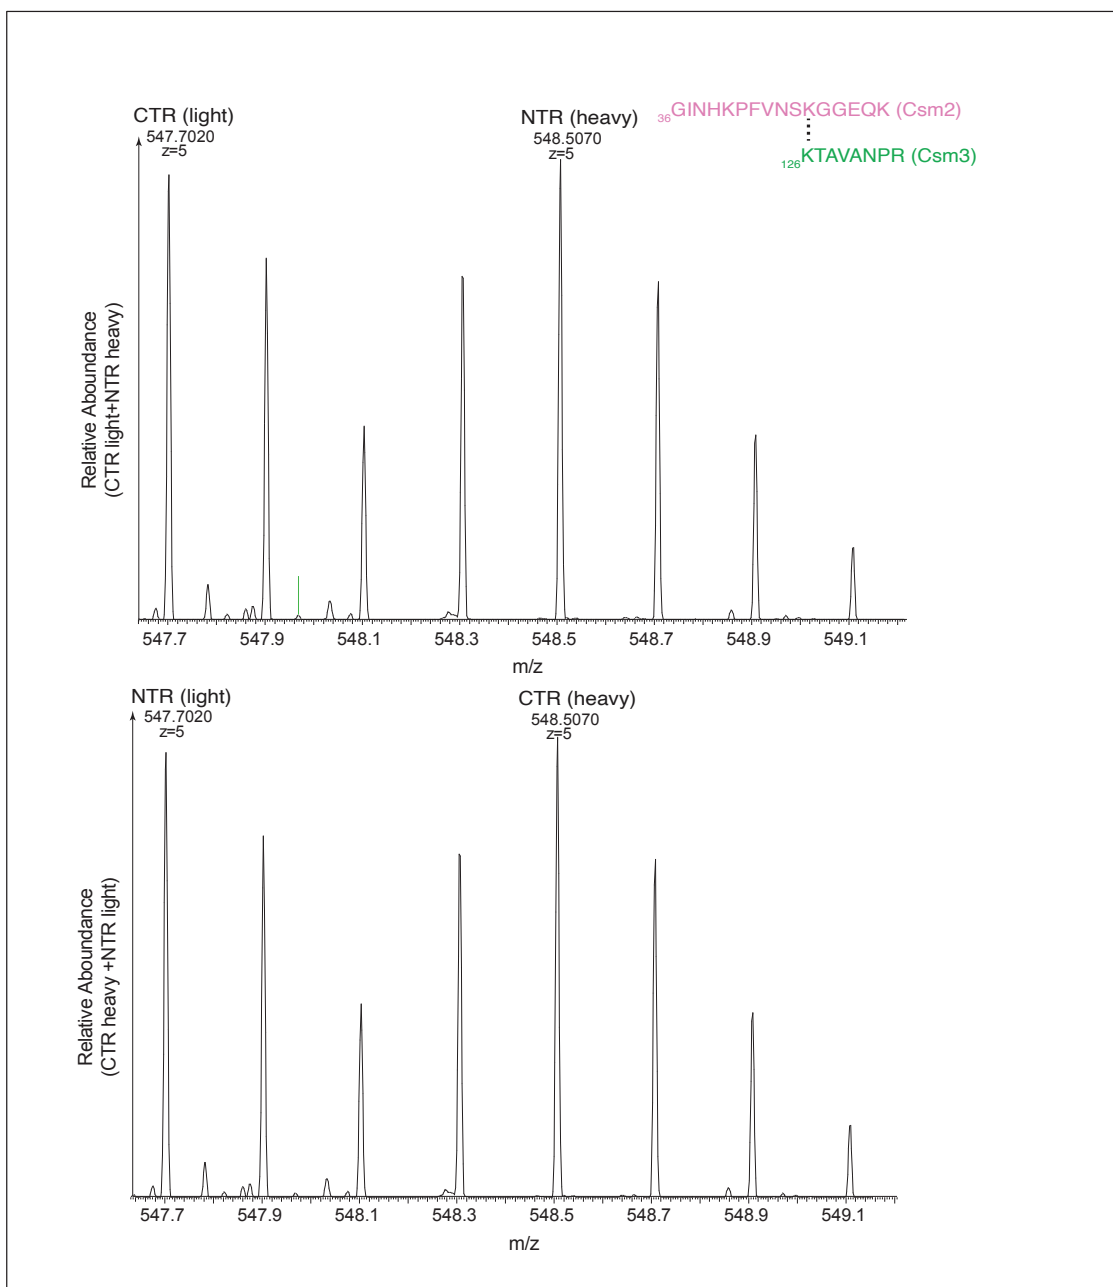

**Figure S11. Example spectra of lysine-specific crosslinks indicating similar abundance between the CTR- and the NTR-bound LICsm complexes. Related Figure 6.** The deuterated BS3 (bis(sulfosuccinimidyl) 2,2,7,7-suberate)-d4 is designated as heavy and the non-deuterated BS3-d0 is designated as light, respectively. The peptide sequences for Csm3 and Csm2

matching the identified crosslinks are indicated in the same color scheme used for structural models. The mass and the ion state are indicated to the known accuracy of the instrument.

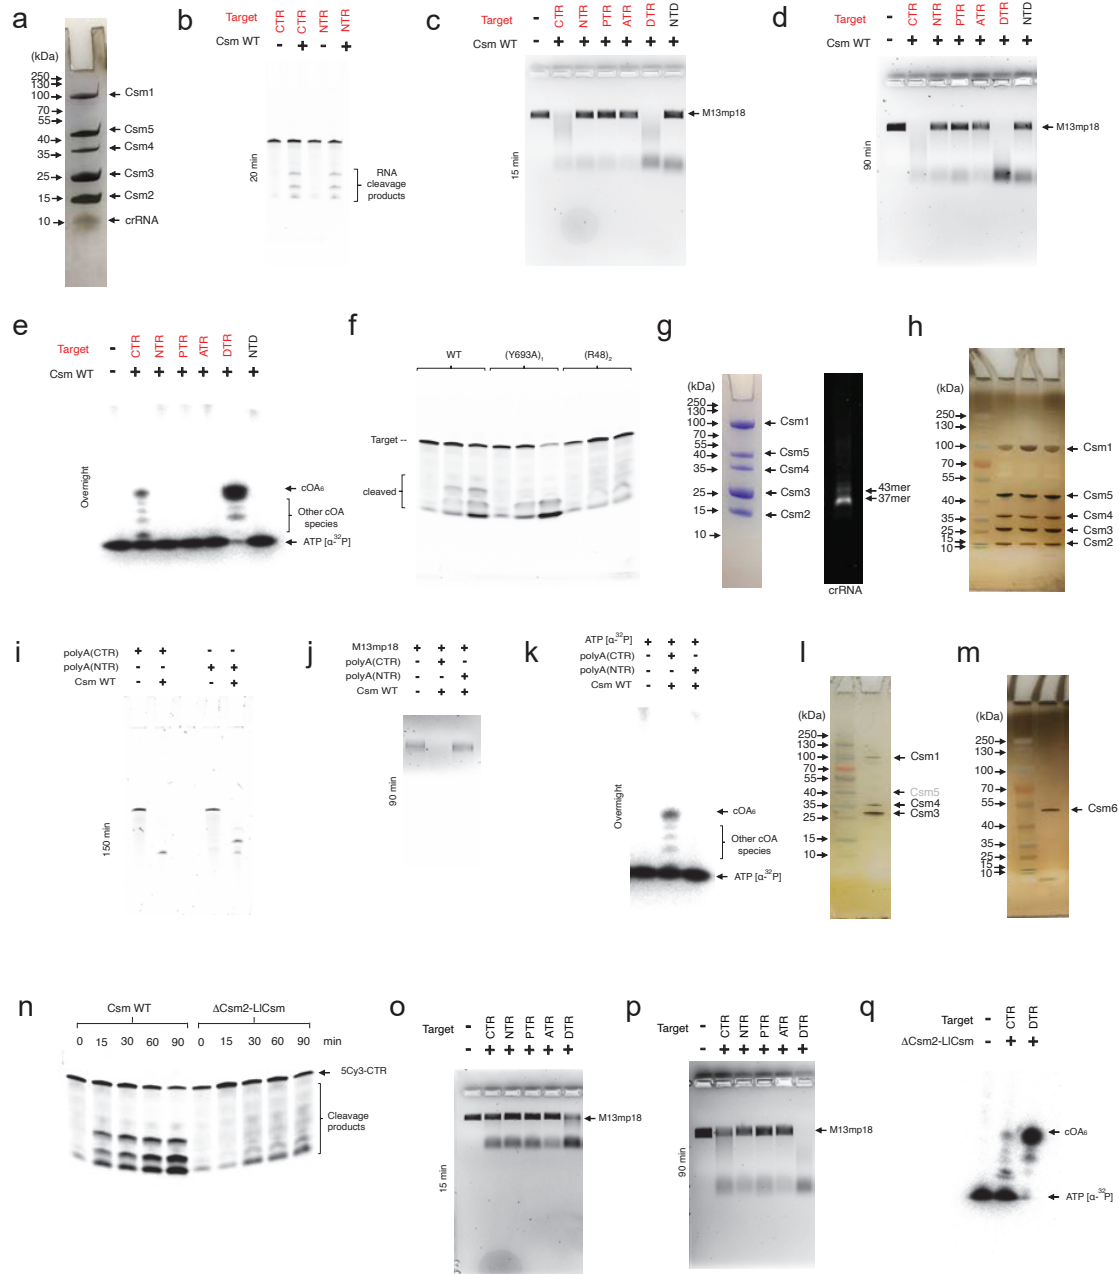

**Figure S12. Uncropped Images. Related to Figures 1, 5, S1 and S2.** (a) Silver stain profile shown in Figure 1D (b) *In vitro* RNA cleavage assay shown in Figure 1E (c) *In vitro* DNA cleavage assay shown in Figure 1F (top) (d) *In vitro* DNA cleavage assay shown in Figure 1F (bottom) (e) Thin layer chromatography (TLC) analysis of cOA synthesis shown in Figure 1G

(f) *In vitro* RNA cleavage assay shown in Figure 5C (g) SDS-PAGE and denaturing Urea-PAGE gel images shown in Figure S1B (h) Silver stain profile shown in Figure S1D (i) *In vitro* RNA cleavage assay shown in Figure S1F (j) *In vitro* DNA cleavage assay shown in Figure S1G (k) *In vitro* cOA synthesis assay shown in Figure S1H (l & m) Silver stain profiles shown in Figure S2D (n) *In vitro* RNA cleavage assay shown in Figure S2E (o) *In vitro* DNA cleavage assay shown in S2F (top) (p) *In vitro* DNA cleavage assay shown in S2F (bottom) (q) *In vitro* cOA synthesis assay shown in S2G.

**Table S1: Compilation of observations of plasmid interference assay and assessment of functionality of variants of LICsm complex. Related to Figures 1 and S2.** Wild type LICsm harboring non-cognate crRNA (WT/NCR), wild type LICsm harboring cognate crRNA (WT/CCR), LICsm Csm3 Asp30Ala mutant (LICsm (D30A)<sub>3</sub>), LICsm Csm1 His13Ala Csm3 Asp30Ala double mutant (LICsm (H13A)<sub>1</sub>(D30A)<sub>3</sub>), LICsm Csm1 Asp14Asn Csm3 Asp30Ala double mutant (LICsm (D14N)<sub>1</sub>(D30A)<sub>3</sub>), LICsm Csm1 His13Ala Asp14Asn double mutant (LICsm (H13A)<sub>1</sub>(D14N)<sub>1</sub>), LICsm Csm1 (GGDD)<sub>574-577</sub> to (GGAA)<sub>574-577</sub> mutant (LICsm (GGAA)<sub>1</sub>), Csm2-deleted LICsm complex ( $\Delta$ Csm2-LICsm), Csm2-deleted LICsm complex harboring Csm1 His13Ala Asp14Asn mutations ( $\Delta$ Csm2-LICsm (H13A)<sub>1</sub>(D14N)<sub>1</sub>) and Csm2-deleted LICsm complex harboring Csm1 (GGDD)<sub>574-577</sub> to (GGAA)<sub>574-577</sub> mutation ( $\Delta$ Csm2-LICsm (GGAA)<sub>1</sub>) were tested.

| LICsm variant                                               | Plasmid Interference |
|-------------------------------------------------------------|----------------------|
| WT/NCR                                                      | NO                   |
| WT/CCR                                                      | YES                  |
| LICsm (D30A) <sub>3</sub>                                   | YES                  |
| LICsm (H13A) <sub>1</sub> (D30A) <sub>3</sub>               | YES                  |
| LICsm (D14N) <sub>1</sub> (D30A) <sub>3</sub>               | YES                  |
| LICsm (H13A) <sub>1</sub> (D14N) <sub>1</sub>               | YES                  |
| LICsm (GGAA) <sub>1</sub>                                   | NO                   |
| $\Delta$ Csm2-LICsm                                         | NO                   |
| $\Delta$ Csm2-LICsm (H13A) <sub>1</sub> (D14N) <sub>1</sub> | NO                   |
| $\Delta$ Csm2-LICsm (GGAA) <sub>1</sub>                     | NO                   |



**Table S2: Statistics of cryo-EM data processing and model refinement. Related to Figures 2, 4 and 5, Table S5.**

| <b>Data acquisition and processing parameters</b>            | <b>CTR_4:3 complex</b>              | <b>CTR_3:2 complex</b>              | <b>Apo complex</b>                  | <b>NTR complex</b>                  |
|--------------------------------------------------------------|-------------------------------------|-------------------------------------|-------------------------------------|-------------------------------------|
| Microscope                                                   | Titan Krios                         | Titan Krios                         | Titan Krios                         | Titan Krios                         |
| Detector                                                     | Gatan K3                            | Gatan K3                            | Gatan K3                            | Gatan K3                            |
| Voltage                                                      | 300 kV                              | 300 kV                              | 300 kV                              | 300 kV                              |
| Electron Source                                              | Field Emission Gun                  | Field Emission Gun                  | Field Emission Gun                  | Field Emission Gun                  |
| Collecting Mode                                              | Counting                            | Counting                            | Counting                            | Counting                            |
| Dose Rate ( $e^-/\text{\AA}^2$ )                             | 60.07                               | 60.07                               | 61.51                               | 60.14                               |
| Defocus range ( $\mu\text{m}$ )                              | -1.3 to -2.8                        | -1.3 to -2.8                        | -1.3 to -2.8                        | -1.4 to 3                           |
| Nominal Magnification                                        | 81000X                              | 81000X                              | 81000X                              | 81000X                              |
| Frames collected per exposure                                | 75                                  | 75                                  | 74                                  | 70                                  |
| Framealignment Software                                      | MotionCor2                          | MotionCor2                          | MotionCor2                          | MotionCor2                          |
| CTF parameter estimation Software                            | Gctf                                | Gctf                                | Gctf                                | Gctf                                |
| Total number of raw images collected                         | 5,179                               | 5,179                               | 4,382                               | 3,922                               |
| Number of images used for particle picking                   | 2,543                               | 2,543                               | 2,336                               | 1,892                               |
| Initial particles picked                                     | 2,157,655                           | 2,157,655                           | 3,636,087                           | 2,865,725                           |
| 2D classification software                                   | Cryosparc (2)                       | Cryosparc (2)                       | Cryosparc (2)                       | Cryosparc (2)                       |
| Final reconstruction software                                | Cistem (3)                          | Relion 3.1 (4)                      | Cistem (3)                          | Relion 3.1 (4)                      |
| Applied symmetry                                             | C1                                  | C1                                  | C1                                  | C1                                  |
| Number of particles contributed for the final reconstruction | 54,783                              | 62,413                              | 436,641                             | 39,220                              |
| Resolution method                                            | FSC 0.143 cut-off                   | FSC 0.143 cut-off                   | FSC 0.143 cut-off                   | FSC 0.143 cut-off                   |
| Map resolution ( $\text{\AA}$ )                              | 3.07                                | 3.35                                | 2.97                                | 3.47                                |
| Local resolution determining Software                        | Resmap                              | Resmap                              | Resmap                              | Resmap                              |
| Map Visualization software                                   | Pymol/Chimera/Chimera X/ Coot (5-7) | Pymol/Chimera/Chimera X/ Coot (5-7) | Pymol/Chimera/Chimera X/ Coot (5-7) | Pymol/Chimera/Chimera X/ Coot (5-7) |
| Deposit EMDB code                                            | 22266                               | 22267                               | 22268                               | 22269                               |
| <b>Refinement parameters</b>                                 |                                     |                                     |                                     |                                     |
| CC (map_model) (mask)                                        | 0.80                                | 0.78                                | 0.80                                | 0.80                                |
| RMSD (Bond lengths/Bond angles)                              | 0.007/1.142                         | 0.009/1.235                         | 0.007/1.115                         | 0.007/1.097                         |
| Ramachandran plot (%) (Outlier/Allowed/Favored)              | 0.00/7.35/92.65                     | 0.14/10.04/89.83                    | 0.00/7.41/92.59                     | 0.04/7.09/92.87                     |
| C $\beta$ Outliers (%)                                       | 0.00                                | 0.00                                | 0.00                                | 0.00                                |
| MolProbity Score                                             | 1.83                                | 2.09                                | 1.78                                | 1.76                                |
| Clash score                                                  | 6.59                                | 10.35                               | 5.72                                | 5.58                                |
| Rotamer outliers (%)                                         | 0.04                                | 0.00                                | 0.06                                | 0.09                                |
| ADP (B-factor)                                               | 22049                               | 19273                               | 17400                               | 22209                               |
| Protein (min/mask/mean)                                      | 23.14/148.15/68.34                  | 87/812.35/214.36                    | 21.66/128.16/58.25                  | 14.13/102.20/41.28                  |
| Nucleotide (min/mask/mean)                                   | 36.29/133.21/55.59                  | 106.85/205.33/152.09                | 25.43/99.71/50.11                   | 14.85/132.12/38.85                  |
| dFSC model (0/0.143/0.5)                                     | 3.0/3.1/3.5                         | 2.9/3.1/3.7                         | 3.0/3.0/3.3                         | 2.9/3.0/3.5                         |
| Deposit PDB code                                             | 6XN3                                | 6XN4                                | 6XN5                                | 6XN7                                |
|                                                              |                                     |                                     |                                     |                                     |

**Table S3: Nucleic acid sequences and oligonucleotides used in this study. Related to Figures 1, 4, 5 S1, and S2.** Underlined regions indicate either the 5'-handle of the unprocessed/cas6-processed crRNA or the 3'-antitag of the target RNA. Bold in DTR (Deoxyribonucleotide target RNA) highlights Csm3-mediated ribonucleotide cleavage sites replaced by deoxyribonucleotides.

| Nucleic acid                                   | Sequence                                                                                   | Source |
|------------------------------------------------|--------------------------------------------------------------------------------------------|--------|
| Repeat encoded by pACYC plasmids               | 5' <u>aaauacaaccgcuccucgauaaaaaggggacgagaac</u> 3'                                         |        |
| Spacer encoded by pACYC plasmids               | 5' AUACGUUCUUUGAACCAAGCUUCAACUCC 3'                                                        |        |
| HDV ribozyme                                   | 5' GCCGGCCAUGGUCCAGCCUCCUCGCGGGCCGGUGGGCAACAUUC<br>CGAGGGGACCGUCCCCUCGGUAAUGGCGAAUGGGAC 3' |        |
| 37mer mature crRNA                             | 5' <u>acgagaac</u> AUACGUUCUUUGAACCAAGCUUCAACUCC 3'                                        |        |
| 43mer mature crRNA                             | 5' <u>acgagaac</u> AUACGUUCUUUGAACCAAGCUUCAACUCCGCCGGC 3'                                  |        |
| NTR used in activity assays                    | 3' <u>ugcucuug</u> UAUGCAAGAAACUUGGUUCGAAGUUGAGG 5'                                        | IDT    |
| CTR used in activity assays                    | 3' <u>acgagaac</u> UAUGCAAGAAACUUGGUUCGAAGUUGAGG 5'                                        | IDT    |
| PTR used in activity assays                    | 3' UAUGCAAGAAACUUGGUUCGAAGUUGAGG 5'                                                        | IDT    |
| ATR used in activity assays                    | 3' GGAGUUGAAGCUUGGUUCAAGAACGUAU 5'                                                         | IDT    |
| DTR used in activity assays                    | 3' <u>acgagaac</u> UAUGC <b>AAGAAAC</b> UUGGU <b>TCGAAGT</b> UGAGG 5'                      | IDT    |
| PolyA(NTR): Target RNA used in Csm-NTR complex | 3' AAAAA <u>Augcucuug</u> UAUGCAAGAAACUUGGUUCGAAGUUGAGGAA 5'                               | IDT    |
| PolyA(CTR): Target RNA used in Csm-CTR complex | 3' AAAAA <u>acgagaac</u> UAUGCAAGAAACUUGGUUCGAAGUUGAGGAA 5'                                | IDT    |
| Fluorescence DNA Reporter                      | 5' /5Alex594N/TTATTATT/31AbRQSp/3'                                                         | IDT    |
| Fluorescence RNA Reporter                      | 5' /56-FAM/rArArArArA/31ABkFQ/3'                                                           | IDT    |
| 5Cy3-CTR                                       | 5' /5Cy3/AAGGAGUUGAAGCUUGGUUCAAGAACGUAU <u>caagagca</u> AAA<br>AAA 3'                      | IDT    |

|         |                                                                                                                                                                                                               |                           |
|---------|---------------------------------------------------------------------------------------------------------------------------------------------------------------------------------------------------------------|---------------------------|
| M13mp18 | <a href="https://www.snapgene.com/resources/plasmid-files/?set=basic_cloning_vectors&amp;plasmid=M13mp18">https://www.snapgene.com/resources/plasmid-files/?set=basic_cloning_vectors&amp;plasmid=M13mp18</a> | New<br>England<br>Biolabs |
|---------|---------------------------------------------------------------------------------------------------------------------------------------------------------------------------------------------------------------|---------------------------|

**Table S4: Amino acid sequences of *Lactococcus lactis* CRISPR-Cas (Csm) system. Related to Figures 1, 2, 3 and 4 and S1.**

| Subunit    | Amino acid sequence                                                                                                                                                                                                                                                                                                                                                                                                                                                                                                                                                                                                                                                                                                                                                                                                                     |
|------------|-----------------------------------------------------------------------------------------------------------------------------------------------------------------------------------------------------------------------------------------------------------------------------------------------------------------------------------------------------------------------------------------------------------------------------------------------------------------------------------------------------------------------------------------------------------------------------------------------------------------------------------------------------------------------------------------------------------------------------------------------------------------------------------------------------------------------------------------|
| Cas10/Csm1 | MDKINLVCGSLLHDIGKIIYRGTSERAKHSKLGDFIKSFEQFRNTELTDCIRYH<br>HAQEITSVKSNEKNSLFYITYIADNISSGMDRRKDLEEGAEGFNWDKKVALGSV<br>FNVLNEKEKGRQNYSPFVARTRIKEEPLNFPTATQNQYTTSSYYDGLITDMKTIL<br>QRLKPDKEHINSLLQMMESLWSYVPSSTDKNQLVDISLYDHSRTTAAIASAIYDY<br>FQAENITDYQKELFDYNATEFYDKNAFLMMNFDMSGVQNFYINISGSKALKSLRA<br>RSFYLDMLLEYISDNLLEKLELSRANILYVGGGHAYLLLANTNKTAKILSDFEHD<br>LKTWFLDKFKIDLYVAMAYTEVSANDLMNHNGHYRDIYRRLSQKTSAKKANRYTA<br>EEILNLNHQGTENARECRECKRSDLLIEEDDICEICDSLQKVSRLTRENIFVIA<br>NEGVLDMPPFGKKMSALSYSQADKLLKSNAEVQIYAKNISEIGQNLMTRIDMGDYT<br>YRSDFHEMLEEVEVGINRLGVLRADVDNLGQAFINGIPDDYLSISRTATFSRAMS<br>RFFKNYLNQLLAEKSYKINVIYAGDDLFMIGAWQDILDFSIVLKQKFADFTQNK<br>LSISAGIGMFREKYPVARMASLTGDLEDAADYKPDERAVQATKNAVTLFDATNV<br>FSWDTLENDIFVKLDAITKNFEKLEDETGKAFIYRLIDLLRGVNNENQQINIARLAY<br>TLSRMEEKIGKTFAQELYNWANADRKTLIMALEIYILKTRER |
| Csm2-NHis  | MGHHHHHSGGTELKIGNEKVNSTNFGDFAEKAIRGINHKPFVNSKGGEQKITTS<br>KIRGILELVNKVYNRVINTNDVELSENILADIAYIKVKIAYESGREPVVKDFIQR<br>TAFTAAITDVMNQRTRESFLLFARYVESLIAYFKFYGGKD                                                                                                                                                                                                                                                                                                                                                                                                                                                                                                                                                                                                                                                                           |
| Csm3       | MKLVIIEGTIVLKTGMHIGGSSDFSAIGAVDSPVVRDTLTRLPLIPGSSLKGMRY<br>LLAKELNNGIILLNEPNNDQDEILRLFGSSEKDKIRRARLKFNDIKLSNLAELETF<br>NVSSTEVKFENTINRKTAVANPRQIERVIAGSKFDFEIFYNLDDIKEVEKDFENI<br>KQGFDLLEFDYLGGHGTRGSGRIAFENLSVITAVGNFEKINTLNEILGA                                                                                                                                                                                                                                                                                                                                                                                                                                                                                                                                                                                                     |
| Csm4       | MKI IKLYFESPVHFGEKRLSESKITFSADTLFSALMIEAVGLGKEDEFYQLASNN<br>LVKFSDAFPFDQYYYIPKPMFNLKLEKEDENPSKAFKLLYVPIDSLEDYLSGG<br>LDAYFERESFNLGKLALSEKVVQHQHDFKDSEPNVGTFTFFKENTGLYVLIEQTHPL<br>LEELLENLQYSGIGGKRNSGYGKFKFEILEDSIEDLFSKGNRKILLSGALPKD                                                                                                                                                                                                                                                                                                                                                                                                                                                                                                                                                                                                 |

|      |                                                                                                                                                                                                                                                                                                                                                                                                                                                                |
|------|----------------------------------------------------------------------------------------------------------------------------------------------------------------------------------------------------------------------------------------------------------------------------------------------------------------------------------------------------------------------------------------------------------------------------------------------------------------|
|      | AELEQALKNASYLLERRGGFVQSDTYATNLVKKQDLYVFKSGSTFENSFDGDIYQ<br>VGKKGHPVYKYAKSFFLEVS                                                                                                                                                                                                                                                                                                                                                                                |
| Csm5 | MKKTYRVTLTALGPIFIGGGEKLLKYEYIFDKQKKVAHMIDHTKFTKYLLEKNLL<br>DDFTSRVNSHFDDLYDYLVNKKGIVFMPLVKYSVPVAQFRTEVKNRFGKPISSPPM<br>NDLNTFVKDAFGRPYIPGSSSLK GALRTAILNDLKEDTKENEVFAHLQVSDSETID<br>LENLKVYQKVDYSKTAKPLPLYRECLKPNT EITFTVVSFDDEYLTLKKIQNALHKT<br>YQHYYIKWLKGGKVGETLIKGVYDSHADELKKNTFALDQPSQNQGEI IYIGGGAG<br>FVSKTLHYKSKNRDQARNSFDILKQLFRFTTYSKMRSVPDNPVAVALKLAVETKTF<br>NGRVTGKHYLEMGKARIKLEELK                                                               |
| Csm6 | MKILISAVGDTDPIRNFHDGPLLHIVRVYRPEKIVLVHSERSLTKHDKLVKALKS<br>IKDYSPEI IQDGVVLPDAQVAIFDEMYDTVSSIVKKYISDDEI IILNISSATPQII<br>SAMFAVNRI SDFNVTAVQVKTPOHKSNEGLRHDNQEDIDKLIETNLDNQSDYENR<br>TLADTGMKFSQDLTKRNLKALIDNYDYQGALELLKKQKSFSNIKELRKKL TEISD<br>TIKI QGMPDKIVKSKLSNQAKSALNSYLNIDRNHKQGNIAEVLIRVKS LVEFILE<br>DYLNNHFLDVITYKDGK PFLNASKYPEILKKFQEDAEMRGKEYHSGYLSLPAYIG<br>ILKFFEPNHDL LKHIYKIQEINQDRNKVAHSLQAFDRKNLKKVSSAVFASKQILL<br>ASFDIDNHWF SFYEDLNQEIKLL |
| Cas6 | MIVKLRYKINLPNSLRTQNI GSTLHGVLME LLPSELVEHLHNL SYNPFQR LIFE<br>KELVIWEIVGLHKMVSEELLKLENLREITIKRAQKTVSLSLLSKDAIAVDDL VKK<br>EMGREIDSRIISLKF TSP TSFKANGHYDIFPDIRKIFRSLMMNFDFSETTKIYD<br>YEVLSYIEENVHIVSYKLMTKNFHLEKIKVKGFQGDMTLKV TGAEQFVKLVLLMI<br>KYATFAGIGMKTSLGMGGVSINERHYLR                                                                                                                                                                                 |

**Table S5. List of cross-linked residues and comparison of cross-linking abundance in CTR and NTR complexes**

| Cross-linked residues              | Peptide identified in 1 <sup>st</sup> subunit | Peptide identified in 2 <sup>nd</sup> subunit | Abundance ratio CTR/NTR | Abundance ratio NTR/CTR |
|------------------------------------|-----------------------------------------------|-----------------------------------------------|-------------------------|-------------------------|
| 726 <sub>1</sub> -149 <sub>2</sub> | IGKTFAQELYNWANADR                             | FYGGKD                                        | 0.86                    | 1.46                    |
| 683 <sub>1</sub> -149 <sub>2</sub> | NFEKLDETGK                                    | FYGGKD                                        | 1.54                    | 1.39                    |
| 723 <sub>1</sub> -126 <sub>3</sub> | MEEKIGK                                       | KTAVANPR                                      | 0.96                    | 1.32                    |
| 683 <sub>1</sub> -126 <sub>3</sub> | NFEKLDETGK                                    | KTAVANPR                                      | 1.20                    | Not observed            |
| 683 <sub>1</sub> -86 <sub>3</sub>  | NFEKLDETGK                                    | LFGSSEKDK                                     | 0.58                    | 1.83                    |
| 374 <sub>1</sub> -83 <sub>4</sub>  | LSQKTSKAK                                     | LEKEDENPSK                                    | 0.90                    | 0.90                    |
| 379 <sub>1</sub> -83 <sub>4</sub>  | KANR                                          | LEKEDENPSK                                    | 0.87                    | 1.15                    |
| 46 <sub>2</sub> -126 <sub>3</sub>  | GINHKPFVNSKGGEQK                              | KTAVANPR                                      | 0.97                    | 1.02                    |
| 56 <sub>2</sub> -126 <sub>3</sub>  | ITTSKIR                                       | KTAVANPR                                      | Not observed            | 1.22                    |
| 149 <sub>2</sub> -309 <sub>5</sub> | FYGGKD                                        | TTYSKMR                                       | 1.32                    | 1.27                    |
| 86 <sub>3</sub> -279 <sub>4</sub>  | LFGSSEKDK                                     | KGNHPVYK                                      | 7.14                    | 0.22                    |
| 86 <sub>3</sub> -137 <sub>4</sub>  | LFGSSEKDK                                     | VQQHDFKIDSEPNVVGTFK                           | 2.75                    | 0.30                    |
| 126 <sub>3</sub> -144 <sub>5</sub> | TAILNDIKEDTK                                  | KTAVANPR                                      | 1.12                    | 1.12                    |
| 126 <sub>3</sub> -300 <sub>5</sub> | NDSFDIKKQLFR                                  | KTAVANPR                                      | 1.12                    | 1.45                    |
| 618 <sub>1</sub> -271 <sub>1</sub> | EKYPVAR                                       | ALKSLR                                        | 1.14                    | 1.14                    |
| 135 <sub>1</sub> -597 <sub>1</sub> | IKEEPNFPTATQNQYTTSYDGLITDMK                   | QKFADFTQNK                                    | 0.62                    | 1.63                    |
| 321 <sub>1</sub> -374 <sub>1</sub> | TKAILSDFEHDLK                                 | LSQKTSKAK                                     | 1.43                    | 1.16                    |
| 105 <sub>2</sub> -149 <sub>2</sub> | IAYESGREPVVKDFIQR                             | FYGGKD                                        | 1.09                    | 1.43                    |
| 56 <sub>2</sub> -149 <sub>2</sub>  | FYGGKD                                        | FYGGKD                                        | 1.05                    | 1.19                    |
| 86 <sub>3</sub> -126 <sub>3</sub>  | LFGSSEKDK                                     | KTAVANPR                                      | 1.04                    | 1.56                    |
| 88 <sub>3</sub> -126 <sub>3</sub>  | LFGSSEKDKIR                                   | KTAVANPR                                      | 1.06                    | 1.56                    |
| 52 <sub>5</sub> -75 <sub>5</sub>   | YLLEKNLLDDFTSR                                | KGIVFMPLVK                                    | 1.04                    | 0.90                    |
| 337 <sub>5</sub> -98 <sub>5</sub>  | VTGKHYLEMGK                                   | TEVKNR                                        | 0.96                    | 0.98                    |
| 182 <sub>5</sub> -309 <sub>5</sub> | TAKPLPLYR                                     | TTYSKMR                                       | 1.38                    | 1.30                    |

**Table S6. KEY RESOURCES TABLE**

| <b>Reagent/Resource</b>                                                  | <b>Source</b>           | <b>Identifier</b> |
|--------------------------------------------------------------------------|-------------------------|-------------------|
| <b><u>Bacterial Strains</u></b>                                          |                         |                   |
| <i>E. coli</i> DH5a                                                      | ATCC                    | 67879             |
| <i>E. coli</i> NiCo(DE3)                                                 | New England BioLabs     | C2529H            |
| <i>E. coli</i> BL21 AI                                                   | Invitrogen              | C6070-03          |
| <i>E. coli</i> TOP10                                                     | Invitrogen              | C404010           |
| <b><u>Reagents and Chemicals</u></b>                                     |                         |                   |
| LB Broth, Miller                                                         | VWR                     | J106-2KG          |
| Terrific broth                                                           | Sigma                   | T 0918            |
| Chloramphenicol                                                          | Sigma                   | C-0378            |
| Agar, bacteriological                                                    | VWR                     | J637-1KG          |
| Agarose                                                                  | Fisher BioReagents      | BP160-500         |
| Isopropyl- $\beta$ -D-Thiogalactopyranoside (IPTG)                       | Affymetrix              | 367-93-1          |
| Sodium chloride                                                          | Sigma                   | S7653             |
| (4-(2-hydroxyethyl)-1-piperazineethanesulfonic acid) (HEPES) sodium salt | Sigma                   | H7006-500G        |
| Imidazole                                                                | ACROS Organics          | 288-32-4          |
| Glycerol                                                                 | Fisher Chemical         | G33-4             |
| 2-Mercaptoethanol                                                        | VWR                     | M131-250mL        |
| Magnesium chloride                                                       | Sigma                   | M8266-100G        |
| Manganese chloride                                                       | Sigma                   | M3634-100G        |
| Nickel(II) sulfate hexahydrate                                           | Sigma                   | 227676-100G       |
| Sodium dodecyl sulphate                                                  | VWR                     | 0227-100G         |
| 4-Morpholinepropanesulfonic acid (MOPS)                                  | Sigma                   | M1254-250G        |
| Urea                                                                     | Fisher Biotech          | BP169-212         |
| Acrylamide/Bis-acrylamide, 29:1                                          | Sigma                   | A2792-100ML       |
| Tetramethylethylenediamine (TEMED)                                       | OmniPur                 | 110-18-9          |
| Ammonium Peroxydisulfate                                                 | Fisher Chemical         | A682-500          |
| Bromophenol Blue                                                         | Bio-Rad                 | 161-040           |
| PageRuler Prestained Protein Ladder                                      | ThermoFisher Scientific | 26616             |
| Gel loading dye, Purple                                                  | New England Biolabs     | B7025S            |
| Dithiothreitol (DTT)                                                     | VWR                     | 0281-25G          |
| M13mp18                                                                  | New England Biolabs     | N4040S            |
| KLD Enzyme Mix 25 rxns                                                   | New England Biolabs     | M0554S            |
| BamHI                                                                    | New England Biolabs     | R0136S            |

|                                   |                              |              |
|-----------------------------------|------------------------------|--------------|
| EcoRI                             | New England Biolabs          | R0101S       |
| T4 DNA Ligase                     | New England Biolabs          | M0202L       |
| Acetic acid, Glacial              | EMD Millipore Corporation    | AX0073.9     |
| Methanol                          | Spectrum Chemical Mfg. Corp. | M1240        |
| SYBR Gold Nucleic Acid Gel Stain  | Invitrogen                   | S11494       |
| [ $\alpha$ - <sup>32</sup> P] ATP | PerkinElmer                  | BLU002Z250UC |
| Ethidium bromide                  | Sigma                        | E-7637       |

## **Commercial Kits**

|                                   |                     |          |
|-----------------------------------|---------------------|----------|
| E.Z.N.A. Plasmid DNA Miniprep Kit | Omega BIO-TEK       | D6942-01 |
| ZymoPURE II Plasmid Midiprep Kit  | Zymo Research       | D4201    |
| Silver Stain Plus Kit             | Bio-Rad             | 1610449  |
| Q5 Site-directed Mutagenesis Kit  | New England Biolabs | E0554S   |
| Gibson Assembly Cloning Kit       | New England Biolabs | E5510S   |

## **Deposited data**

|                          |            |          |
|--------------------------|------------|----------|
| Binary/Apo LICsm complex | This study | PDB 6XN5 |
| LICsm-NTR complex        | This study | PDB 6XN7 |
| LICsm-CTR_43 complex     | This study | PDB 6XN3 |
| LICsm-CTR_32 complex     | This study | PDB 6XN4 |

## **Software**

|                                     |                                                                                                                                                                                                           |
|-------------------------------------|-----------------------------------------------------------------------------------------------------------------------------------------------------------------------------------------------------------|
| Adobe Illustrator                   | <a href="https://www.adobe.com/products/illustrator.html">https://www.adobe.com/products/illustrator.html</a>                                                                                             |
| The PyMOL Molecular Graphics System | <a href="https://pymol.org/2/">https://pymol.org/2/</a>                                                                                                                                                   |
| COOT                                | <a href="https://www2.mrc-lmb.cam.ac.uk/personal/pemsley/coot">https://www2.mrc-lmb.cam.ac.uk/personal/pemsley/coot</a>                                                                                   |
| Chimera X                           | <a href="https://www.cgl.ucsf.edu/chimerax/">https://www.cgl.ucsf.edu/chimerax/</a>                                                                                                                       |
| Chimera                             | <a href="https://www.cgl.ucsf.edu/chimera/">https://www.cgl.ucsf.edu/chimera/</a>                                                                                                                         |
| Phenix                              | <a href="https://www.phenix-online.org/">https://www.phenix-online.org/</a>                                                                                                                               |
| RELION 3.0/3.1                      | <a href="https://github.com/3dem/relion">https://github.com/3dem/relion</a>                                                                                                                               |
| CryoSPARC                           | <a href="https://cryosparc.com/">https://cryosparc.com/</a>                                                                                                                                               |
| CisTEM                              | <a href="https://cistem.org/">https://cistem.org/</a>                                                                                                                                                     |
| Motion cor2                         | <a href="https://emcore.ucsf.edu/ucsf-motioncor2">https://emcore.ucsf.edu/ucsf-motioncor2</a>                                                                                                             |
| Gctf                                | <a href="https://www2.mrc-lmb.cam.ac.uk/research/locally-developed-software/zhangy-developed-software/">https://www2.mrc-lmb.cam.ac.uk/research/locally-developed-software/zhangy-developed-software/</a> |
| SnapGene Viewer                     | <a href="https://www.snapgene.com/">https://www.snapgene.com/</a>                                                                                                                                         |
| T-Coffee                            | <a href="http://tcoffee.crg.cat/apps/tcoffee/do:regular">http://tcoffee.crg.cat/apps/tcoffee/do:regular</a>                                                                                               |



Boxshade

[http://www.ch.embnet.org/software/BOX\\_form.html](http://www.ch.embnet.org/software/BOX_form.html)

### Supplementary References:

1. J. Zivanov *et al.*, New tools for automated high-resolution cryo-EM structure determination in RELION-3. *eLife* **7** (2018).
2. A. Punjani, J. L. Rubinstein, D. J. Fleet, M. A. Brubaker, cryoSPARC: algorithms for rapid unsupervised cryo-EM structure determination. *Nature methods* **14**, 290-296 (2017).
3. T. Grant, A. Rohou, N. Grigorieff, cisTEM, user-friendly software for single-particle image processing. *eLife* **7** (2018).
4. J. Zivanov, T. Nakane, S. H. W. Scheres, Estimation of high-order aberrations and anisotropic magnification from cryo-EM data sets in RELION-3.1. *IUCrJ* **7**, 253-267 (2020).
5. E. F. Pettersen *et al.*, UCSF Chimera--a visualization system for exploratory research and analysis. *J Comput Chem* **25**, 1605-1612 (2004).
6. T. D. Goddard *et al.*, UCSF ChimeraX: Meeting modern challenges in visualization and analysis. *Protein Sci* **27**, 14-25 (2018).
7. P. Emsley, B. Lohkamp, W. G. Scott, K. Cowtan, Features and development of Coot. *Acta crystallographica. Section D, Biological crystallography* **66**, 486-501 (2010).
